# Supplementary material for: Effect of Camel Milk on Glucose Homeostasis in Patients with Diabetes: A Systematic Review and Meta-Analysis of Randomized Controlled Trials
Source: Nutrients. 2022 Mar 15;14(6):1245. doi: 10.3390/nu14061245 (PMC8954674; doi:10.3390/nu14061245)
Supplement: Supplementary file 1 [file nutrients-14-01245-s001.zip › nutrients-1610372-supplementary.pdf]

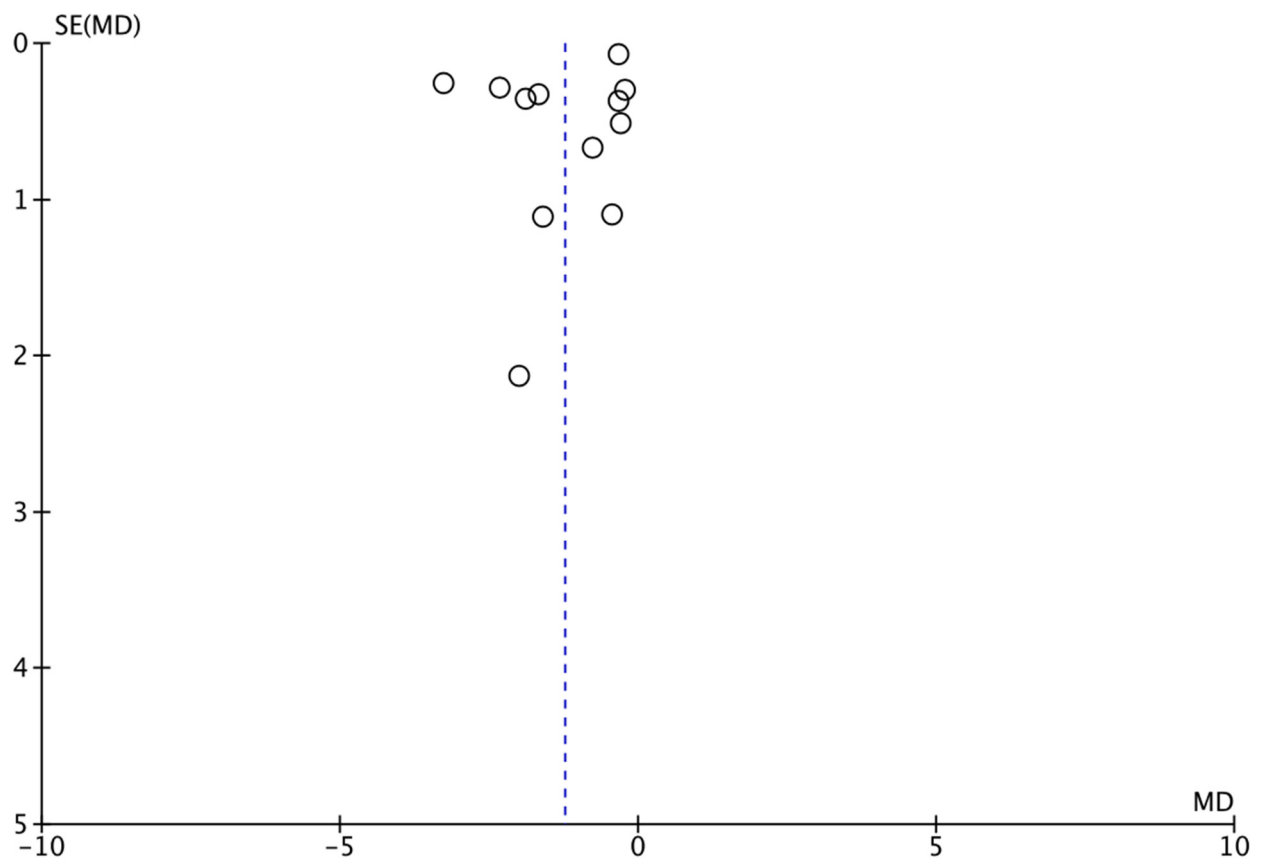

**Figure S1.** Funnel plot for HbA1c.

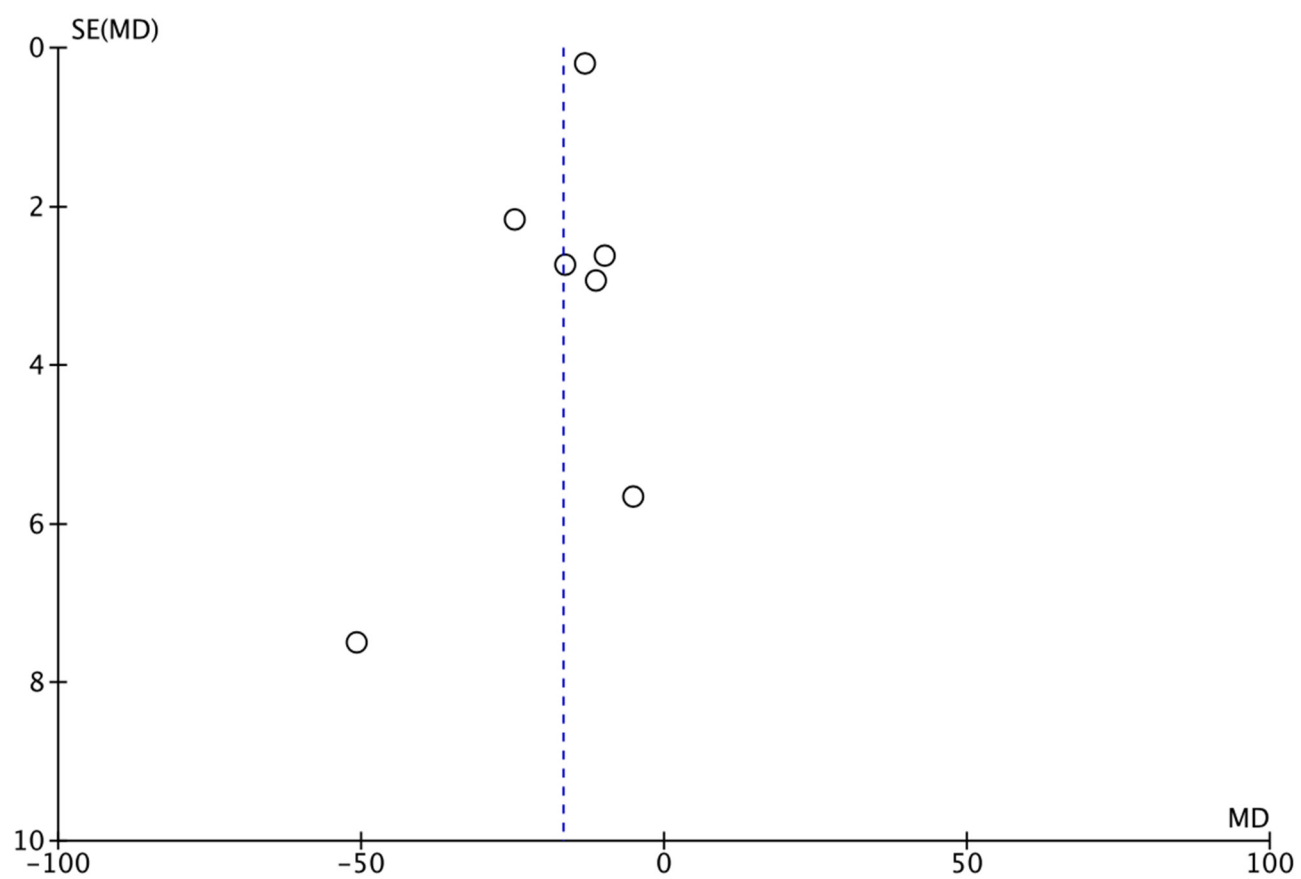

**Figure S2.** Funnel plot for ID.

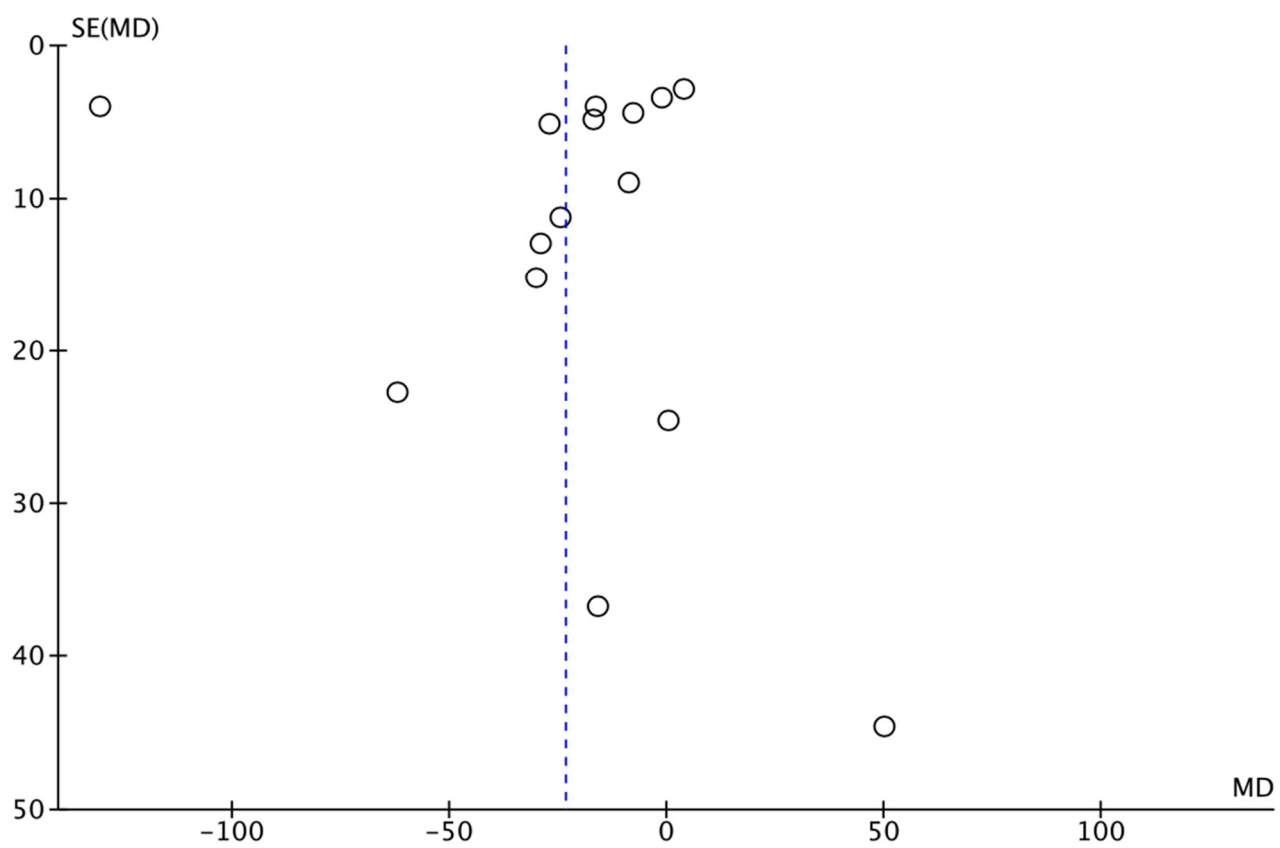

**Figure S3.** Funnel plot for FBG.

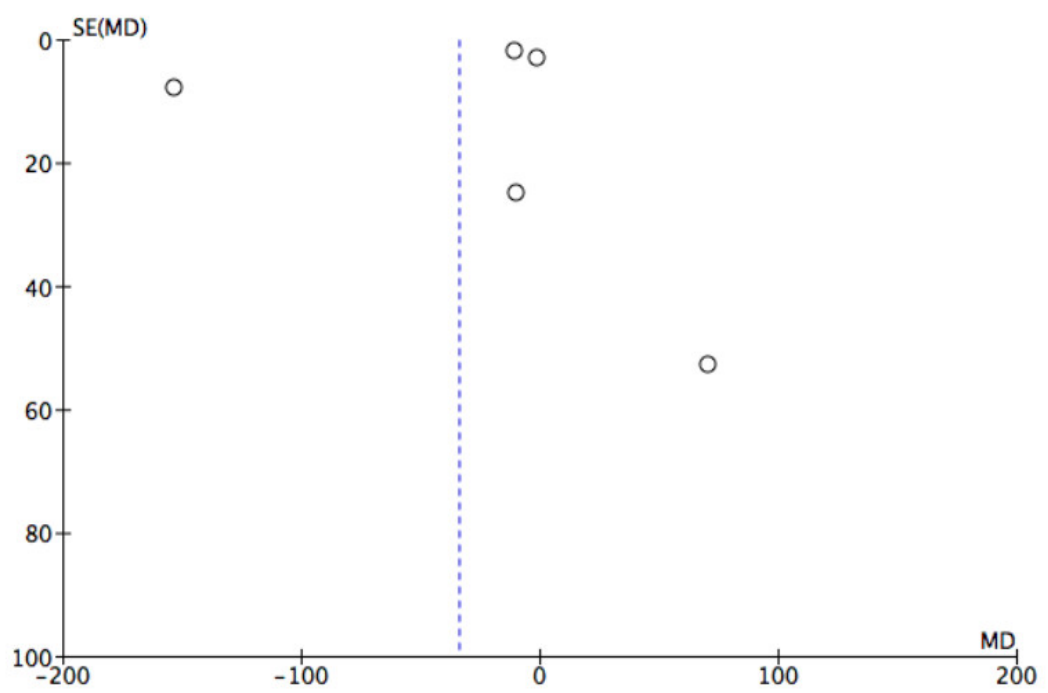

**Figure S4.** Funnel plot for PBG.

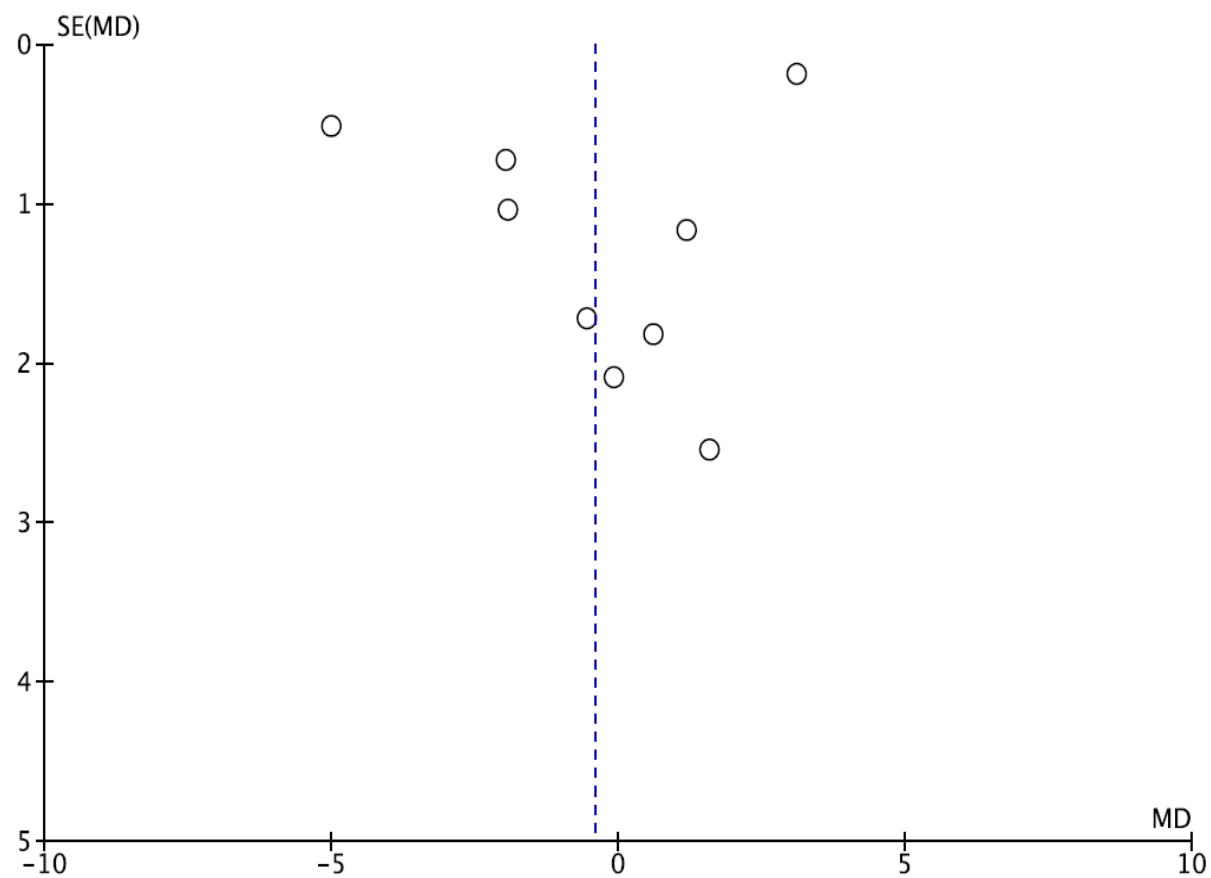

**Figure S5.** Funnel plot for FI.

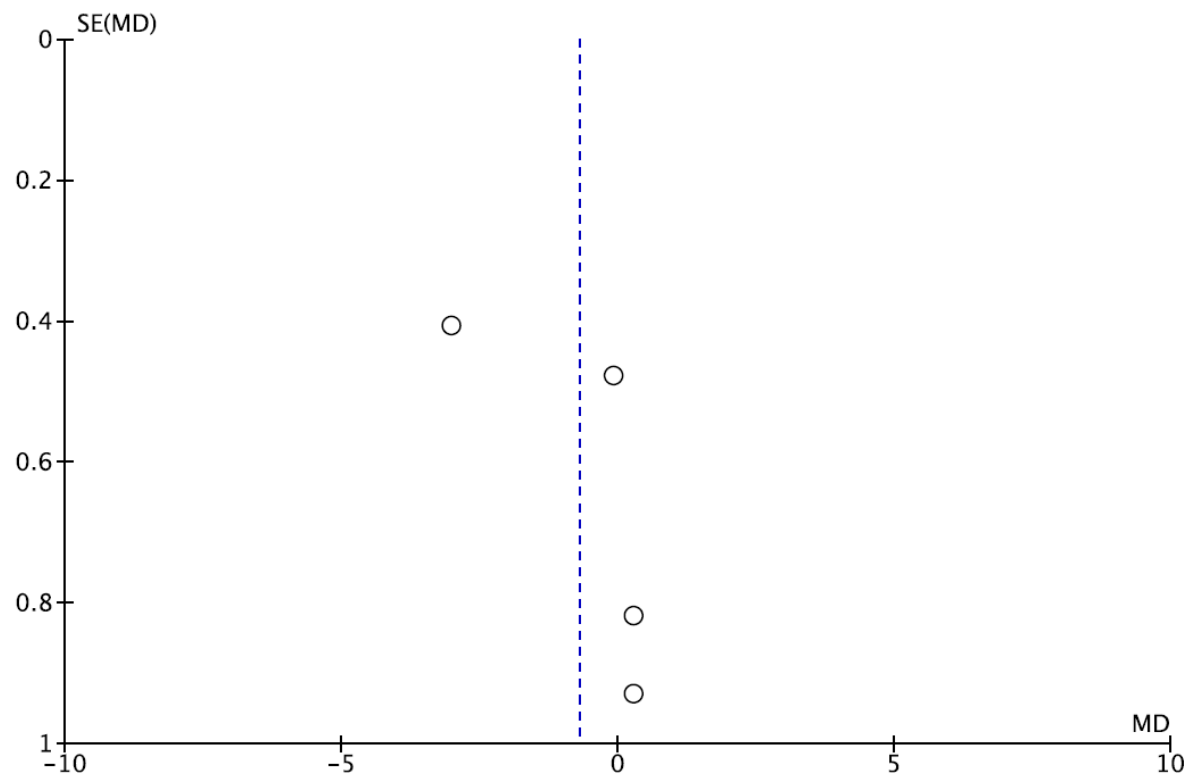

**Figure S6.** Funnel plot for HOMA-IR.

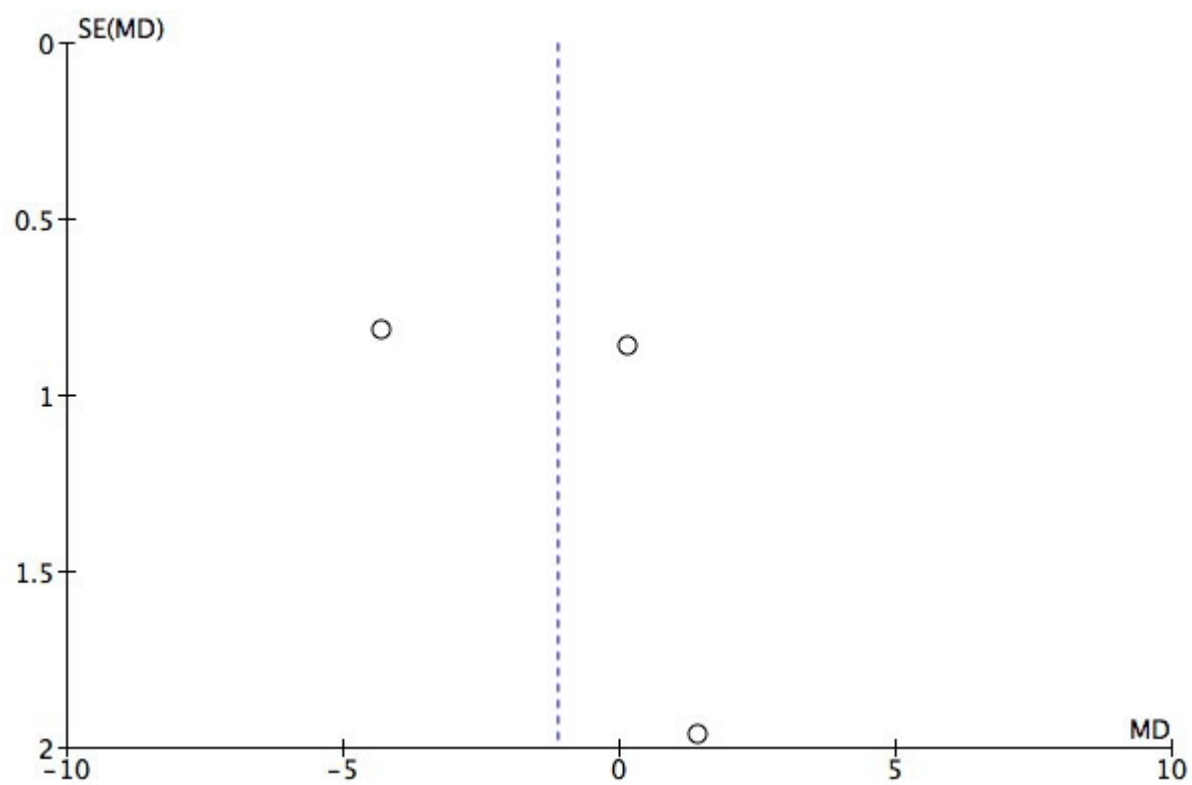

**Figure S7.** Funnel plot for IA.

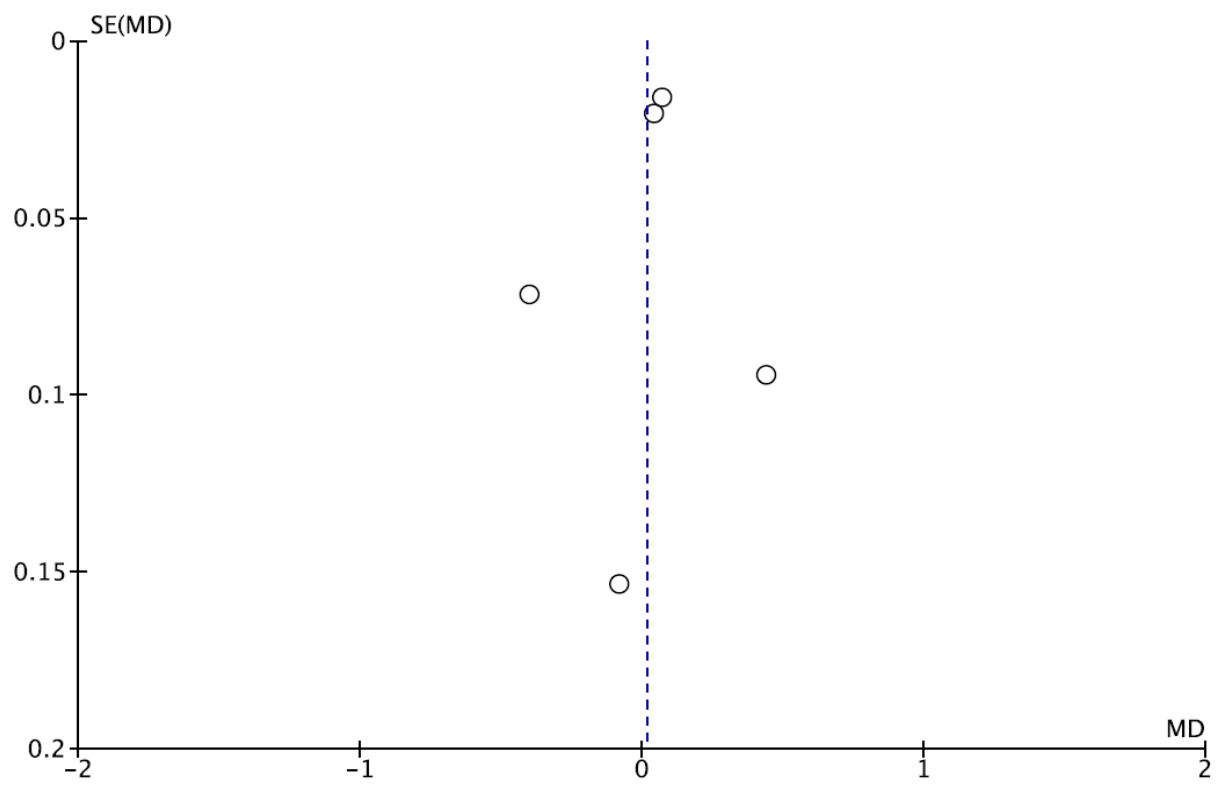

**Figure S8.** Funnel plot for CP.
